# Supplementary material
Source: publisher figshare collection journal article supplement (https://gsajournals.figshare.com/ndownloader/files/24705125)
Supplement: Supplementary file 1 [file 24705125]

**Table S1. P values of differences in desaturation index**

|  | **fat-1 vs EV** | **fat-4 vs EV** | **Figure** |
| --- | --- | --- | --- |
| **N2** | <0.0001 | <0.0001 | 2 |
| ***rde-1(ne219)*** | 0.0084 | 0.0003 | 2 |
| ***rde-1(ne300)*** | 0.5573 | 0.5146 | 2 |
| ***rrf-1*** | <0.0001 | 0.0002 | 2 |
| ***ppw-1*** | 0.0006 | 0.0003 | 2 |
| ***sid-1*** | 0.4754 | 0.1002 | 2 |
| ***rde-4*** | 0.0335 | <0.0001 | 2 |
| ***WM119*** | 0.0002 | 0.00013 | 2 |
| ***rde-3*** | <0.0001 | <0.0001 | 2 |
| ***rde-10*** | <0.0001 | 0.0001 | 2 |
| ***rde-11*** | 0.0004 | 0.0007 | 2 |
| **N2** | 0.0007 | <0.0001 | 4 |
| ***rde-1(ne300)*** | 0.3251 | 0.5701 | 4 |
| **Germline-specific RNAi** | 0.0389 | 0.0043 | 4 |
| **Intestine-specific RNAi** | 0.0016 | 0.0045 | 4 |
| **Skin-specific RNAi** | 0.0092 | 0.0023 | 4 |
| **Muscle-specific RNAi** | 0.2259 | 0.1454 | 4 |
